# Supplementary material
Source: Springer Nature journal article supplement (http://www.springermedizin.de/resource/supplementary/12955_2010_750_MOESM2_ESM.pdf/9560926)

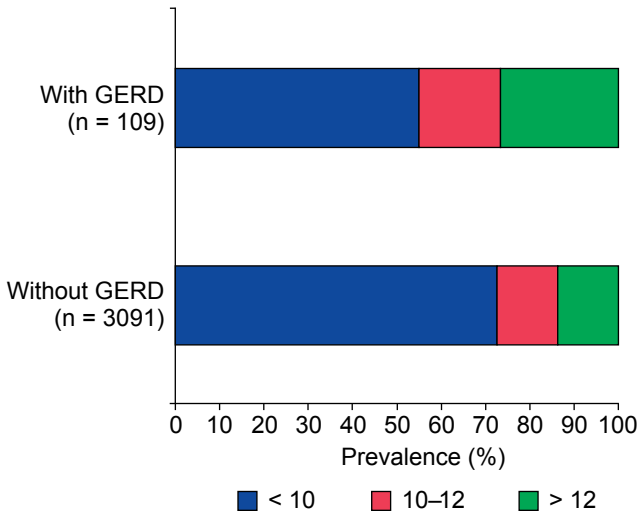

Supplement: MOESM2 [file 9560926]
